# Supplementary material for: The trans-kingdom battle between donor and recipient gut microbiome influences fecal microbiota transplantation outcome
Source: PubMed Central journal article supplement (PMC7591866; doi:10.1038/s41598-020-75162-x), 2020-10-27
Supplement: 41598_2020_75162_MOESM2_ESM.pdf [file 41598_2020_75162_MOESM2_ESM.pdf]

## Supplementary Information

### **A trans-kingdom battle between donor and recipient gut microbiome influences fecal microbiota transplantation outcome**

Negin Kazemian<sup>1</sup>, Milad Ramezankhani<sup>1</sup>, Aarushi Sehgal<sup>2</sup>, Faizan Muhammad Khalid<sup>1</sup>, Amir Hossein Zeinali Kalkhoran<sup>3</sup>, Apurva Narayan<sup>3</sup>, Gane Ka-Shu Wong<sup>4,5,6</sup>, Dina Kao<sup>7\*</sup> & Sepideh Pakpour<sup>1\*</sup>

*<sup>1</sup>School of Engineering, University of British Columbia, Kelowna, BC, Canada*

*<sup>2</sup>Department of Computer Science and Engineering, National Institute of Technology, Hamirpur, Himachal Pradesh, India*

*<sup>3</sup>Department of Computer Science, University of British Columbia, Kelowna, BC, Canada*

*<sup>4</sup>Department of Biological Sciences, University of Alberta, Edmonton, Alberta, Canada*

*<sup>5</sup>Department of Medicine, University of Alberta, Edmonton, Alberta, Canada*

*<sup>6</sup>BGI-Shenzhen, Beishan Industrial Zone, Yantian District, Shenzhen, China*

*<sup>7</sup>Division of Gastroenterology, Department of Medicine, University of Alberta, Edmonton, Alberta, Canada*

\* Corresponding authors

sepideh.pakpour@ubc.ca (SP)

dkao@ualberta.ca (DK)

**Table S1.** Clinical characteristics of rCDI patients receiving FMT. Among recipients, 9/17 patients were successfully treated with a single FMT (53% successful FMT), while 8/17 patients failed the first FMT and required a second procedure. There was no difference between the two groups in factors of age ( $p=0.7039$ ), sex ( $p=1.000$ ), or duration of rCDI pre-FMT ( $p=0.4237$ ). The Shapiro-Wilk test was used to determine if data were normally distributed. If normally distributed, a Student t-test was used, and if not the nonparametric Mann–Whitney U test was performed.

|                                         | <b>Single FMT</b>   | <b>Repeated FMT</b> |
|-----------------------------------------|---------------------|---------------------|
| <b>Number of patients</b>               | 9                   | 8                   |
| <b>Age</b>                              | 67.7 (35.3-84.9)    | 71.4 (49.5-83.8)    |
| <b>Gender</b>                           | 6 male; 3 female    | 5 male; 3 female    |
| <b>Average duration of rCDI pre-FMT</b> | 150.4 days (71-275) | 126.2 days (53-246) |

Numbers are given as means with range in brackets.

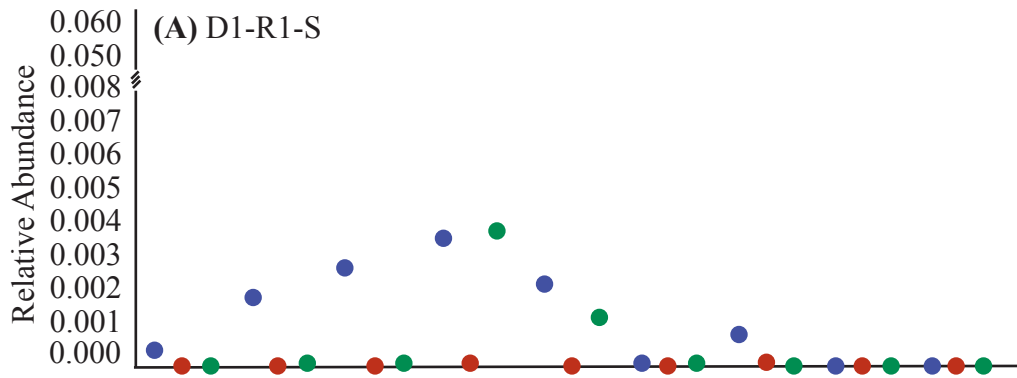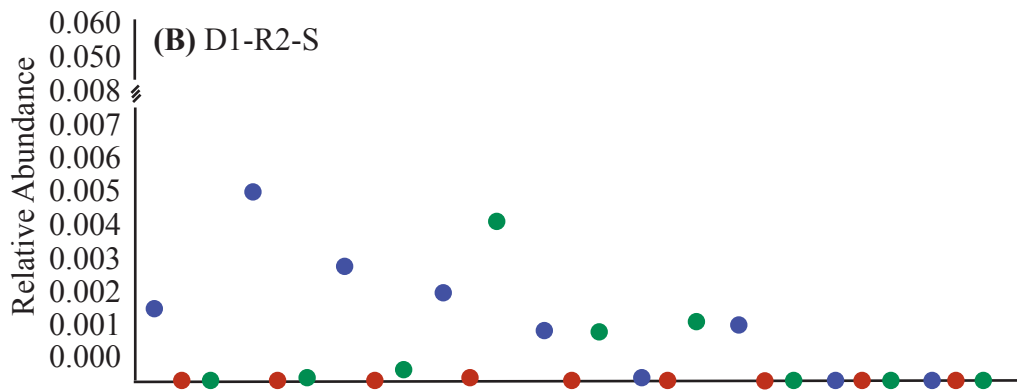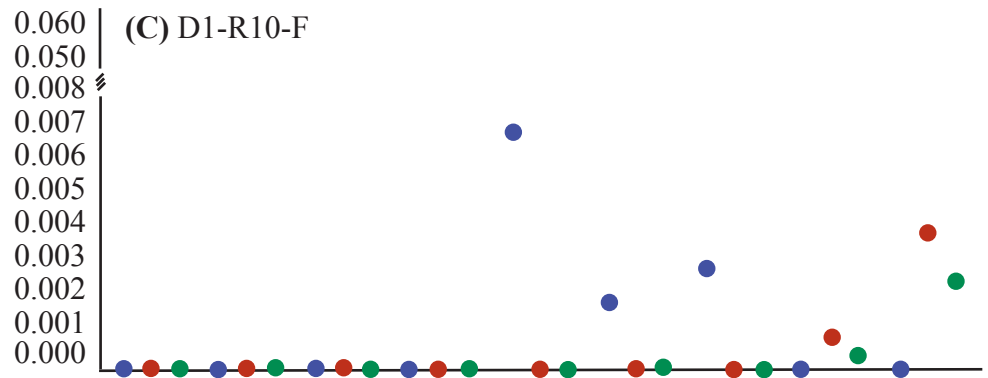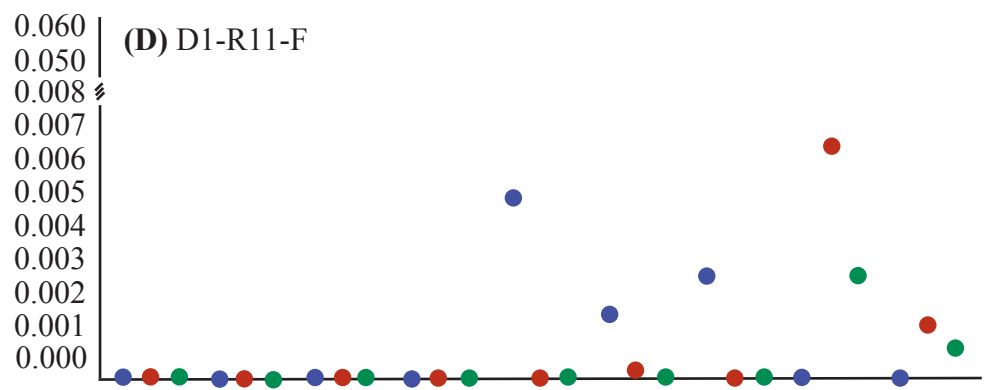

**Fig. S1** The intra-variability of relative abundance of the top 9 features of donor 1 (**D1**) samples and their corresponding recipients, pre- and post-FMT leading to successful (**A** and **B**) and failed (**C** and **D**) FMT outcomes.

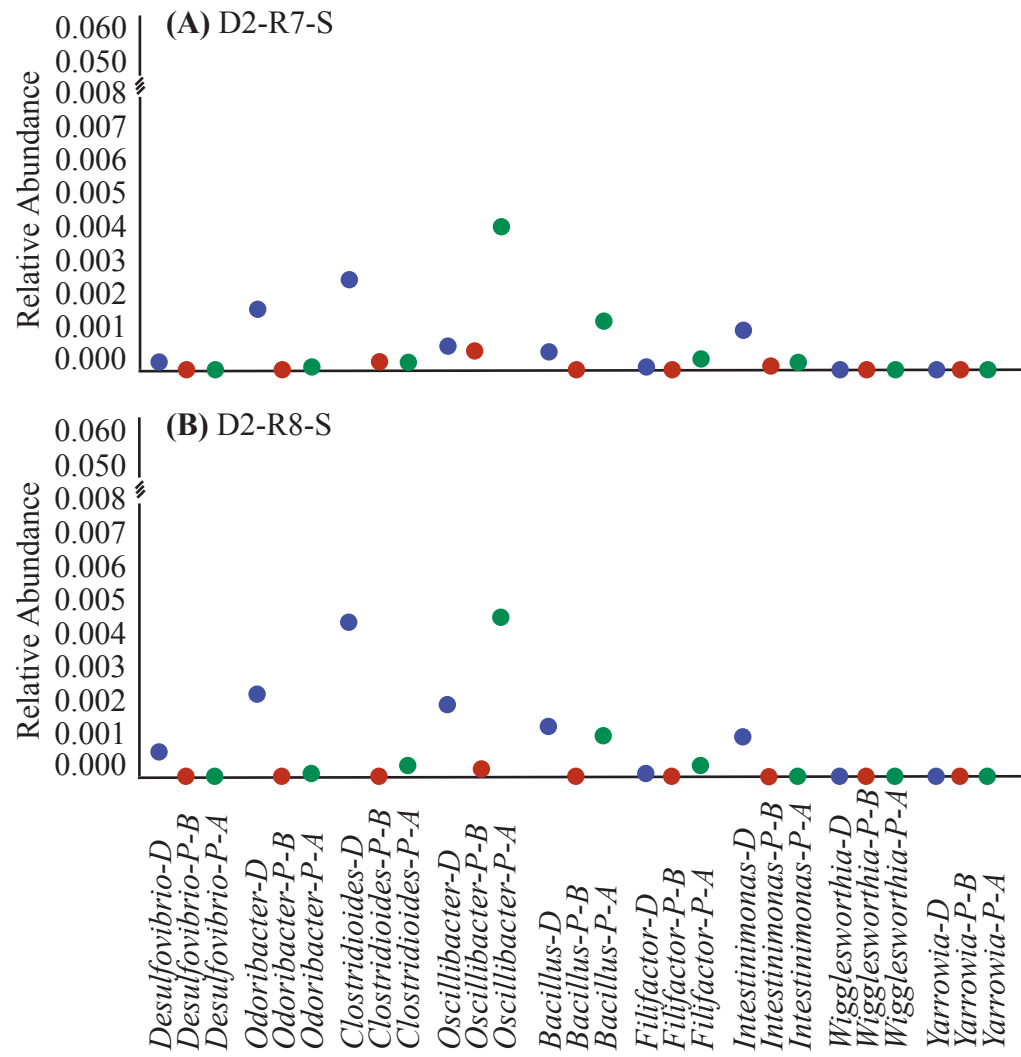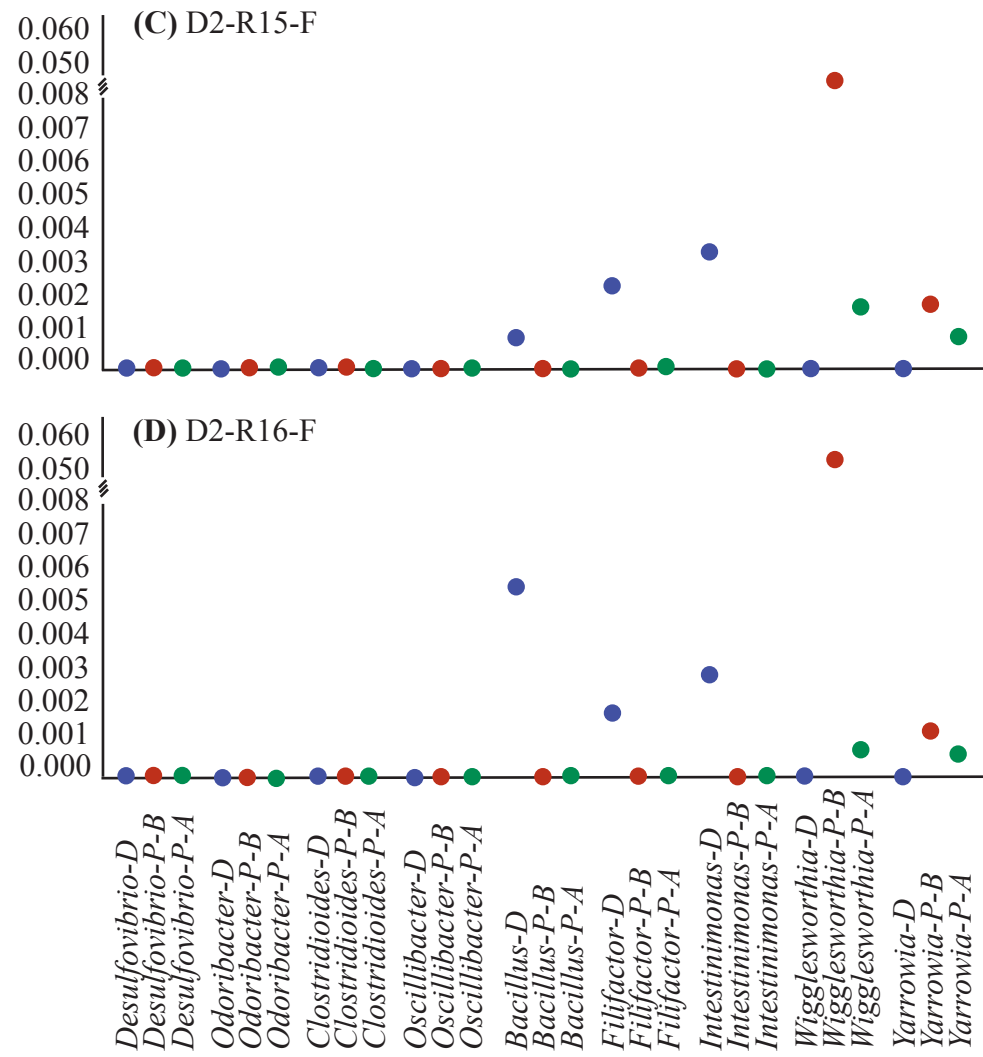

**Fig. S2** The intra-variability of relative abundance of the top 9 features of donor 3 (**D3**) samples and their corresponding recipients, pre- and post-FMT leading to successful (**A** and **B**) and failed (**C** and **D**) FMT outcomes.
